# Supplementary material for: Development and Validation of a Prediction Model for Future Estimated Glomerular Filtration Rate in People With Type 2 Diabetes and Chronic Kidney Disease
Source: PubMed Central journal article supplement (PMC10077108; doi:10.1001/jamanetworkopen.2023.1870), 2023-04-05
Supplement: jamanetwopen-e231870-s002.pdf [file jamanetwopen-e231870-s002.pdf]

## Data Sharing Statement

Gregorich. Development and Validation of a Prediction Model for Future Estimated Glomerular Filtration Rate in People With Type 2 Diabetes and Chronic Kidney Disease. *JAMA Netw Open*. Published April 05, 2023. doi:10.1001/jamanetworkopen.2023.1870

### Data

**Data available:** No
